# Supplementary material for: BsmI, ApaI and TaqI Polymorphisms in the Vitamin D Receptor Gene (VDR) and Association with Lumbar Spine Pathologies: An Italian Case-Control Study
Source: PLoS One. 2016 May 5;11(5):e0155004. doi: 10.1371/journal.pone.0155004 (PMC4858196; doi:10.1371/journal.pone.0155004)
Supplement: S1 Appendix — (PDF) [file pone.0155004.s001.pdf]

| ID | Subjects | Bsml | TaqI | Apa1 |
|----|----------|------|------|------|
| 1  | 1        | 1,2  | 1,1  | 1,1  |
| 2  | 1        | 2,2  | 1,1  | 2,2  |
| 3  | 1        | 1,1  | 1,2  | 1,1  |
| 4  | 1        | 1,1  | 1,2  | 1,1  |
| 5  | 1        | 1,1  | 1,2  | 1,1  |
| 6  | 1        | 1,1  | 2,2  | 1,1  |
| 7  | 1        | 2,2  | 1,1  | 2,2  |
| 8  | 1        | 1,1  | 1,2  | 1,1  |
| 9  | 1        | 1,1  | 1,2  | 1,1  |
| 10 | 1        | 2,2  | 1,1  | 1,2  |
| 11 | 1        | 1,2  | 1,2  | 1,1  |
| 12 | 1        | 1,2  | 1,1  | 1,1  |
| 13 | 1        | 1,2  | 1,2  | 1,2  |
| 14 | 1        | 1,2  | 1,2  | 1,2  |
| 15 | 1        | 2,2  | 1,1  | 1,2  |
| 16 | 1        | 1,2  | 1,2  | 1,2  |
| 17 | 1        | 2,2  | 1,1  | 1,2  |
| 18 | 1        | 1,2  | 1,2  | 1,2  |
| 19 | 1        | 2,2  | 1,1  | 1,2  |
| 20 | 1        | 1,2  | 1,2  | 1,2  |
| 21 | 1        | 1,2  | 1,2  | 1,2  |
| 22 | 1        | 1,1  | 2,2  | 1,1  |
| 23 | 1        | 1,2  | 1,2  | 1,2  |
| 24 | 1        | 2,2  | 1,1  | 2,2  |
| 25 | 1        | 1,2  | 1,2  | 1,2  |
| 26 | 1        | 1,2  | 1,2  | 1,2  |
| 27 | 1        | 1,2  | 1,2  | 1,2  |
| 28 | 1        | 1,2  | 1,2  | 1,1  |
| 29 | 1        | 1,2  | 1,1  | 1,2  |
| 30 | 1        | 2,2  | 1,1  | 1,2  |
| 31 | 1        | 2,2  | 1,1  | 1,2  |
| 32 | 1        | 2,2  | 1,1  | 2,2  |
| 33 | 1        | 1,2  | 1,2  | 1,2  |
| 34 | 1        | 2,2  | 1,1  | 2,2  |
| 35 | 1        | 1,2  | 1,2  | 1,2  |
| 36 | 1        | 2,2  | 1,1  | 1,2  |
| 37 | 1        | 2,2  | 1,1  | 1,2  |
| 38 | 1        | 1,1  | 2,2  | 1,1  |
| 39 | 1        | 2,2  | 1,1  | 2,2  |
| 40 | 1        | 1,2  | 1,2  | 1,2  |
| 41 | 1        | 2,2  | 1,1  | 2,2  |
| 42 | 1        | 1,2  | 1,1  | 1,1  |
| 43 | 1        | 2,2  | 1,1  | 1,2  |
| 44 | 1        | 2,2  | 1,1  | 1,2  |
| 45 | 1        | 1,2  | 1,2  | 1,2  |
| 46 | 1        | 1,2  | 1,2  | 1,2  |
| 47 | 1        | 1,2  | 1,1  | 1,2  |
| 48 | 1        | 1,1  | 1,2  | 1,1  |
| 49 | 1        | 1,2  | 1,2  | 1,2  |
| 50 | 1        | 2,2  | 1,1  | 1,2  |
| 51 | 1        | 1,2  | 1,1  | 1,1  |
| 52 | 1        | 1,2  | 1,1  | 1,1  |

|     |   |     |     |     |
|-----|---|-----|-----|-----|
| 53  | 1 | 1,2 | 2,2 | 1,1 |
| 54  | 1 | 1,2 | 1,2 | 1,2 |
| 55  | 1 | 1,2 | 1,2 | 1,2 |
| 56  | 1 | 1,2 | 1,1 | 2,2 |
| 57  | 1 | 1,2 | 1,1 | 1,1 |
| 58  | 1 | 1,2 | 1,2 | 1,2 |
| 59  | 1 | 1,2 | 1,1 | 1,2 |
| 60  | 1 | 1,2 | 1,1 | 1,2 |
| 61  | 1 | 1,2 | 1,2 | 1,2 |
| 62  | 1 | 1,2 | 1,2 | 1,2 |
| 63  | 1 | 1,2 | 1,1 | 1,2 |
| 64  | 1 | 1,1 | 1,2 | 1,1 |
| 65  | 1 | 1,2 | 1,1 | 1,2 |
| 66  | 1 | 1,2 | 1,1 | 2,2 |
| 67  | 1 | 1,2 | 1,2 | 1,1 |
| 68  | 1 | 1,1 | 2,2 | 1,1 |
| 69  | 1 | 1,1 | 2,2 | 1,1 |
| 70  | 1 | 1,2 | 1,2 | 1,2 |
| 71  | 1 | 2,2 | 1,1 | 2,2 |
| 72  | 1 | 1,2 | 1,1 | 2,2 |
| 73  | 1 | 1,2 | 1,1 | 1,2 |
| 74  | 1 | 1,2 | 1,1 | 1,2 |
| 75  | 1 | 1,2 | 1,1 | 1,2 |
| 76  | 1 | 1,2 | 1,2 | 1,2 |
| 77  | 1 | 1,2 | 1,2 | 1,2 |
| 78  | 1 | 1,2 | 1,2 | 1,2 |
| 79  | 1 | 1,1 | 2,2 | 1,1 |
| 80  | 1 | 2,2 | 1,1 | 2,2 |
| 81  | 1 | 1,2 | 1,1 | 1,2 |
| 82  | 1 | 1,2 | 1,2 | 1,2 |
| 83  | 1 | 2,2 | 1,1 | 1,2 |
| 84  | 1 | 1,2 | 1,1 | 1,2 |
| 85  | 1 | 1,2 | 1,1 | 1,2 |
| 86  | 1 | 1,1 | 1,2 | 1,1 |
| 87  | 1 | 1,2 | 1,1 | 1,2 |
| 88  | 1 | 1,2 | 1,2 | 1,2 |
| 89  | 1 | 1,2 | 1,2 | 1,1 |
| 90  | 1 | 1,2 | 1,1 | 2,2 |
| 91  | 1 | 1,2 | 1,2 | 1,2 |
| 92  | 1 | 1,2 | 1,1 | 2,2 |
| 93  | 1 | 1,2 | 1,2 | 1,2 |
| 94  | 1 | 1,2 | 1,2 | 1,2 |
| 95  | 1 | 2,2 | 1,1 | 2,2 |
| 96  | 1 | 1,1 | 2,2 | 1,1 |
| 97  | 1 | 1,2 | 1,2 | 1,2 |
| 98  | 1 | 1,1 | 2,2 | 1,1 |
| 99  | 1 | 1,1 | 2,2 | 1,1 |
| 100 | 1 | 2,2 | 1,1 | 2,2 |
| 101 | 1 | 1,2 | 1,1 | 1,1 |
| 102 | 1 | 2,2 | 1,1 | 1,2 |
| 103 | 1 | 1,1 | 1,2 | 1,1 |
| 104 | 1 | 1,2 | 1,2 | 1,2 |
| 105 | 1 | 1,2 | 1,1 | 1,1 |

|     |   |     |     |     |
|-----|---|-----|-----|-----|
| 106 | 1 | 1,1 | 2,2 | 1,1 |
| 107 | 1 | 2,2 | 1,1 | 2,2 |
| 108 | 1 | 1,2 | 1,2 | 1,2 |
| 109 | 1 | 1,2 | 1,2 | 1,1 |
| 110 | 1 | 1,1 | 2,2 | 1,1 |
| 111 | 1 | 2,2 | 1,1 | 2,2 |
| 112 | 1 | 1,1 | 2,2 | 1,1 |
| 113 | 1 | 1,2 | 1,2 | 1,2 |
| 114 | 1 | 1,2 | 1,2 | 1,2 |
| 115 | 1 | 1,2 | 1,2 | 1,2 |
| 116 | 1 | 2,2 | 1,1 | 1,1 |
| 117 | 1 | 2,2 | 1,1 | 1,2 |
| 118 | 1 | 1,2 | 1,2 | 1,2 |
| 119 | 1 | 1,2 | 1,2 | 1,2 |
| 120 | 1 | 2,2 | 1,1 | 2,2 |
| 121 | 1 | 1,1 | 2,2 | 1,1 |
| 122 | 1 | 1,1 | 2,2 | 1,1 |
| 123 | 1 | 1,2 | 1,2 | 1,2 |
| 124 | 1 | 1,1 | 2,2 | 1,1 |
| 125 | 1 | 1,2 | 1,2 | 1,1 |
| 126 | 1 | 2,2 | 1,1 | 1,2 |
| 127 | 1 | 2,2 | 1,1 | 1,2 |
| 128 | 1 | 1,2 | 1,2 | 1,1 |
| 129 | 1 | 1,2 | 1,2 | 1,2 |
| 130 | 1 | 1,2 | 1,2 | 1,2 |
| 131 | 1 | 1,2 | 1,1 | 1,2 |
| 132 | 1 | 1,2 | 1,2 | 1,2 |
| 133 | 1 | 1,2 | 1,2 | 1,1 |
| 134 | 1 | 2,2 | 1,1 | 1,2 |
| 135 | 1 | 1,2 | 1,2 | 1,2 |
| 136 | 1 | 1,1 | 2,2 | 1,1 |
| 137 | 1 | 2,2 | 1,1 | 1,2 |
| 138 | 1 | 2,2 | 1,1 | 1,2 |
| 139 | 1 | 1,1 | 2,2 | 1,1 |
| 140 | 1 | 1,2 | 1,2 | 1,2 |
| 141 | 1 | 1,2 | 1,2 | 1,1 |
| 142 | 1 | 1,1 | 1,2 | 1,1 |
| 143 | 1 | 1,2 | 1,2 | 1,2 |
| 144 | 1 | 2,2 | 1,1 | 2,2 |
| 145 | 1 | 2,2 | 1,1 | 2,2 |
| 146 | 1 | 1,2 | 1,2 | 1,2 |
| 147 | 1 | 2,2 | 1,1 | 1,2 |
| 148 | 1 | 1,2 | 1,1 | 1,2 |
| 149 | 1 | 1,2 | 1,2 | 1,2 |
| 150 | 1 | 2,2 | 1,1 | 1,2 |
| 151 | 1 | 1,2 | 1,2 | 1,2 |
| 152 | 1 | 2,2 | 1,1 | 2,2 |
| 153 | 1 | 2,2 | 1,1 | 2,2 |
| 154 | 1 | 1,1 | 1,2 | 1,1 |
| 155 | 1 | 1,1 | 1,2 | 1,1 |
| 156 | 1 | 1,2 | 1,2 | 1,2 |
| 157 | 1 | 1,2 | 1,2 | 1,1 |
| 158 | 1 | 2,2 | 1,1 | 1,2 |

|     |   |     |     |     |
|-----|---|-----|-----|-----|
| 159 | 1 | 2,2 | 1,1 | 2,2 |
| 160 | 1 | 2,2 | 1,1 | 2,2 |
| 161 | 1 | 2,2 | 1,1 | 2,2 |
| 162 | 1 | 1,1 | 2,2 | 1,1 |
| 163 | 1 | 1,2 | 1,2 | 1,2 |
| 164 | 1 | 1,2 | 1,2 | 1,1 |
| 165 | 1 | 2,2 | 1,1 | 1,2 |
| 166 | 1 | 1,1 | 2,2 | 1,1 |
| 167 | 1 | 1,1 | 2,2 | 1,1 |
| 168 | 1 | 1,2 | 1,2 | 1,1 |
| 169 | 1 | 1,1 | 2,2 | 1,1 |
| 170 | 1 | 1,2 | 1,1 | 1,1 |
| 171 | 1 | 2,2 | 1,1 | 2,2 |
| 172 | 1 | 2,2 | 1,2 | 2,2 |
| 173 | 1 | 2,2 | 1,1 | 2,2 |
| 174 | 1 | 1,2 | 1,2 | 1,1 |
| 175 | 1 | 1,1 | 2,2 | 1,1 |
| 176 | 1 | 2,2 | 1,1 | 1,2 |
| 177 | 1 | 2,2 | 1,1 | 1,2 |
| 178 | 1 | 1,2 | 1,2 | 1,2 |
| 179 | 1 | 1,1 | 2,2 | 1,1 |
| 180 | 1 | 2,2 | 1,1 | 1,2 |
| 181 | 1 | 1,1 | 2,2 | 1,1 |
| 182 | 1 | 1,2 | 1,2 | 1,2 |
| 183 | 1 | 1,2 | 1,2 | 1,1 |
| 184 | 1 | 1,1 | 2,2 | 1,1 |
| 185 | 1 | 1,2 | 1,2 | 1,2 |
| 186 | 1 | 1,2 | 1,2 | 1,2 |
| 187 | 1 | 2,2 | 1,1 | 2,2 |
| 188 | 1 | 1,2 | 1,2 | 1,2 |
| 189 | 1 | 1,2 | 1,2 | 1,2 |
| 190 | 1 | 1,2 | 1,2 | 1,2 |
| 191 | 1 | 1,2 | 1,2 | 1,2 |
| 192 | 1 | 1,2 | 2,2 | 1,1 |
| 193 | 1 | 1,2 | 1,2 | 1,1 |
| 194 | 1 | 2,2 | 1,1 | 1,2 |
| 195 | 1 | 2,2 | 1,1 | 1,2 |
| 196 | 1 | 1,2 | 1,1 | 1,2 |
| 197 | 1 | 1,2 | 1,1 | 1,2 |
| 198 | 1 | 1,1 | 2,2 | 1,1 |
| 199 | 1 | 1,2 | 1,2 | 1,1 |
| 200 | 1 | 1,1 | 2,2 | 1,1 |
| 201 | 1 | 1,2 | 1,2 | 1,2 |
| 202 | 1 | 1,2 | 1,2 | 1,2 |
| 203 | 1 | 1,2 | 1,1 | 1,2 |
| 204 | 1 | 2,2 | 1,1 | 1,1 |
| 205 | 1 | 1,1 | 2,2 | 1,1 |
| 206 | 1 | 2,2 | 1,1 | 1,2 |
| 207 | 1 | 1,2 | 1,2 | 1,2 |
| 208 | 1 | 2,2 | 1,1 | 2,2 |
| 209 | 1 | 2,2 | 1,1 | 2,2 |
| 210 | 1 | 2,2 | 1,1 | 1,1 |
| 211 | 1 | 2,2 | 1,1 | 1,2 |

|     |   |     |     |     |
|-----|---|-----|-----|-----|
| 212 | 1 | 2,2 | 1,1 | 1,2 |
| 213 | 1 | 1,2 | 1,2 | 1,2 |
| 214 | 1 | 1,2 | 1,2 | 1,2 |
| 215 | 1 | 1,2 | 1,2 | 1,2 |
| 216 | 1 | 1,2 | 1,1 | 1,2 |
| 217 | 1 | 2,2 | 1,1 | 2,2 |
| 218 | 1 | 1,2 | 1,1 | 1,2 |
| 219 | 1 | 1,2 | 1,2 | 1,2 |
| 220 | 1 | 1,1 | 2,2 | 1,1 |
| 221 | 1 | 1,2 | 1,2 | 1,1 |
| 222 | 1 | 1,2 | 1,1 | 2,2 |
| 223 | 1 | 1,2 | 1,1 | 1,2 |
| 224 | 1 | 1,2 | 1,1 | 1,1 |
| 225 | 1 | 1,2 | 1,1 | 2,2 |
| 226 | 1 | 1,2 | 1,1 | 1,2 |
| 227 | 1 | 1,2 | 1,2 | 1,1 |
| 228 | 1 | 1,2 | 1,1 | 2,2 |
| 229 | 1 | 1,2 | 1,1 | 1,2 |
| 230 | 1 | 1,2 | 1,1 | 2,2 |
| 231 | 1 | 1,2 | 1,2 | 1,2 |
| 232 | 1 | 1,2 | 1,2 | 1,2 |
| 233 | 1 | 1,2 | 1,2 | 1,1 |
| 234 | 1 | 1,2 | 1,2 | 1,2 |
| 235 | 1 | 1,2 | 1,2 | 1,2 |
| 236 | 1 | 1,2 | 1,1 | 1,2 |
| 237 | 1 | 1,2 | 1,2 | 1,2 |
| 238 | 1 | 1,2 | 1,2 | 1,2 |
| 239 | 1 | 1,2 | 1,1 | 2,2 |
| 240 | 1 | 1,2 | 1,2 | 1,2 |
| 241 | 1 | 1,2 | 1,2 | 1,2 |
| 242 | 1 | 1,2 | 1,1 | 2,2 |
| 243 | 1 | 1,2 | 2,2 | 1,1 |
| 244 | 1 | 1,1 | 1,2 | 1,2 |
| 245 | 1 | 1,2 | 1,1 | 1,2 |
| 246 | 1 | 1,2 | 1,2 | 1,1 |
| 247 | 1 | 1,2 | 1,2 | 1,2 |
| 248 | 1 | 1,2 | 1,1 | 1,2 |
| 249 | 1 | 1,2 | 1,2 | 1,2 |
| 250 | 1 | 1,2 | 1,2 | 1,2 |
| 251 | 1 | 2,2 | 1,1 | 2,2 |
| 252 | 1 | 1,2 | 1,2 | 1,2 |
| 253 | 1 | 1,2 | 1,2 | 1,1 |
| 254 | 1 | 2,2 | 1,1 | 1,2 |
| 255 | 1 | 2,2 | 1,1 | 1,2 |
| 256 | 1 | 1,2 | 1,2 | 1,2 |
| 257 | 1 | 1,1 | 1,2 | 1,1 |
| 258 | 1 | 1,2 | 1,2 | 1,1 |
| 259 | 1 | 2,2 | 1,1 | 1,2 |
| 260 | 1 | 2,2 | 1,1 | 2,2 |
| 261 | 1 | 1,2 | 1,2 | 1,2 |
| 262 | 1 | 1,1 | 2,2 | 1,1 |
| 263 | 1 | 1,1 | 2,2 | 1,1 |
| 264 | 1 | 1,2 | 1,2 | 1,1 |

|     |   |     |     |     |
|-----|---|-----|-----|-----|
| 265 | 1 | 2,2 | 1,1 | 1,2 |
| 266 | 1 | 1,1 | 2,2 | 1,1 |
| 267 | 0 | 2,2 | 1,1 | 1,2 |
| 268 | 0 | 1,1 | 2,2 | 1,1 |
| 269 | 0 | 2,2 | 1,1 | 1,1 |
| 270 | 0 | 1,2 | 1,2 | 1,1 |
| 271 | 0 | 1,2 | 1,2 | 1,1 |
| 272 | 0 | 2,2 | 1,1 | 1,1 |
| 273 | 0 | 1,1 | 2,2 | 1,1 |
| 274 | 0 | 2,2 | 1,1 | 1,1 |
| 275 | 0 | 2,2 | 1,1 | 1,2 |
| 276 | 0 | 1,1 | 2,2 | 1,1 |
| 277 | 0 | 2,2 | 1,1 | 2,2 |
| 278 | 0 | 2,2 | 1,1 | 1,1 |
| 279 | 0 | 1,1 | 2,2 | 1,1 |
| 280 | 0 | 1,1 | 2,2 | 1,1 |
| 281 | 0 | 1,1 | 2,2 | 1,1 |
| 282 | 0 | 1,2 | 1,1 | 1,1 |
| 283 | 0 | 1,2 | 1,2 | 1,2 |
| 284 | 0 | 2,2 | 1,1 | 1,1 |
| 285 | 0 | 1,2 | 1,1 | 2,2 |
| 286 | 0 | 1,2 | 1,1 | 1,1 |
| 287 | 0 | 2,2 | 1,1 | 1,2 |
| 288 | 0 | 2,2 | 1,2 | 1,2 |
| 289 | 0 | 2,2 | 1,2 | 1,2 |
| 290 | 0 | 1,1 | 2,2 | 1,1 |
| 291 | 0 | 2,2 | 1,2 | 1,2 |
| 292 | 0 | 1,2 | 1,1 | 1,1 |
| 293 | 0 | 2,2 | 1,1 | 2,2 |
| 294 | 0 | 1,1 | 2,2 | 1,1 |
| 295 | 0 | 2,2 | 2,2 | 1,1 |
| 296 | 0 | 2,2 | 1,1 | 2,2 |
| 297 | 0 | 1,2 | 1,2 | 1,1 |
| 298 | 0 | 2,2 | 1,1 | 2,2 |
| 299 | 0 | 2,2 | 1,1 | 1,2 |
| 300 | 0 | 2,2 | 1,1 | 2,2 |
| 301 | 0 | 1,1 | 2,2 | 1,1 |
| 302 | 0 | 1,2 | 1,2 | 1,2 |
| 303 | 0 | 1,2 | 1,2 | 1,1 |
| 304 | 0 | 1,2 | 1,1 | 1,2 |
| 305 | 0 | 1,1 | 1,2 | 1,1 |
| 306 | 0 | 1,2 | 1,2 | 1,2 |
| 307 | 0 | 1,2 | 1,1 | 1,2 |
| 308 | 0 | 1,2 | 1,2 | 1,2 |
| 309 | 0 | 1,2 | 1,2 | 1,2 |
| 310 | 0 | 2,2 | 1,1 | 2,2 |
| 311 | 0 | 2,2 | 1,1 | 1,2 |
| 312 | 0 | 2,2 | 1,1 | 2,2 |
| 313 | 0 | 2,2 | 1,1 | 2,2 |
| 314 | 0 | 2,2 | 1,1 | 1,1 |
| 315 | 0 | 1,2 | 1,2 | 1,2 |
| 316 | 0 | 1,2 | 1,2 | 1,2 |
| 317 | 0 | 1,2 | 1,2 | 1,1 |

|     |   |     |     |     |
|-----|---|-----|-----|-----|
| 318 | 0 | 1,2 | 1,2 | 1,1 |
| 319 | 0 | 1,1 | 1,2 | 1,1 |
| 320 | 0 | 1,1 | 2,2 | 1,1 |
| 321 | 0 | 2,2 | 1,1 | 2,2 |
| 322 | 0 | 1,2 | 1,1 | 1,2 |
| 323 | 0 | 2,2 | 1,1 | 2,2 |
| 324 | 0 | 1,1 | 1,2 | 1,1 |
| 325 | 0 | 2,2 | 1,1 | 1,2 |
| 326 | 0 | 2,2 | 1,1 | 2,2 |
| 327 | 0 | 1,1 | 1,2 | 1,1 |
| 328 | 0 | 1,2 | 1,2 | 1,1 |
| 329 | 0 | 1,1 | 2,2 | 1,1 |
| 330 | 0 | 1,2 | 1,2 | 1,1 |
| 331 | 0 | 2,2 | 1,1 | 2,2 |
| 332 | 0 | 2,2 | 1,1 | 2,2 |
| 333 | 0 | 1,2 | 1,2 | 1,2 |
| 334 | 0 | 2,2 | 1,1 | 1,1 |
| 335 | 0 | 2,2 | 1,1 | 1,2 |
| 336 | 0 | 1,2 | 1,1 | 2,2 |
| 337 | 0 | 2,2 | 1,1 | 1,2 |
| 338 | 0 | 1,1 | 2,2 | 1,1 |
| 339 | 0 | 2,2 | 1,1 | 1,1 |
| 340 | 0 | 1,2 | 1,2 | 1,2 |
| 341 | 0 | 1,2 | 1,2 | 1,1 |
| 342 | 0 | 1,2 | 1,2 | 1,2 |
| 343 | 0 | 2,2 | 1,1 | 1,2 |
| 344 | 0 | 1,2 | 1,1 | 1,2 |
| 345 | 0 | 2,2 | 1,1 | 1,2 |
| 346 | 0 | 2,2 | 1,2 | 1,2 |
| 347 | 0 | 1,2 | 1,2 | 1,1 |
| 348 | 0 | 2,2 | 1,1 | 2,2 |
| 349 | 0 | 1,1 | 2,2 | 1,1 |
| 350 | 0 | 2,2 | 1,1 | 1,2 |
| 351 | 0 | 1,1 | 2,2 | 1,1 |
| 352 | 0 | 1,2 | 1,2 | 1,2 |
| 353 | 0 | 1,2 | 1,1 | 2,2 |
| 354 | 0 | 1,2 | 1,2 | 1,1 |
| 355 | 0 | 2,2 | 1,1 | 1,2 |
| 356 | 0 | 2,2 | 1,1 | 2,2 |
| 357 | 0 | 1,1 | 2,2 | 2,2 |
| 358 | 0 | 2,2 | 1,1 | 1,1 |
| 359 | 0 | 1,2 | 1,2 | 1,2 |
| 360 | 0 | 1,2 | 1,2 | 1,2 |
| 361 | 0 | 2,2 | 1,1 | 2,2 |
| 362 | 0 | 1,2 | 1,2 | 1,2 |
| 363 | 0 | 2,2 | 1,1 | 2,2 |
| 364 | 0 | 1,2 | 1,2 | 1,2 |
| 365 | 0 | 1,2 | 1,2 | 1,1 |
| 366 | 0 | 1,1 | 2,2 | 1,1 |
| 367 | 0 | 1,2 | 1,2 | 1,2 |
| 368 | 0 | 1,2 | 1,2 | 1,1 |
| 369 | 0 | 1,1 | 2,2 | 1,1 |
| 370 | 0 | 1,2 | 1,2 | 1,2 |

|     |   |     |     |     |
|-----|---|-----|-----|-----|
| 371 | 0 | 1,2 | 1,2 | 1,1 |
| 372 | 0 | 2,2 | 1,1 | 1,2 |
| 373 | 0 | 2,2 | 1,1 | 1,2 |
| 374 | 0 | 2,2 | 1,1 | 2,2 |
| 375 | 0 | 1,1 | 2,2 | 1,1 |
| 376 | 0 | 2,2 | 1,1 | 2,2 |
| 377 | 0 | 1,2 | 1,2 | 1,1 |
| 378 | 0 | 2,2 | 1,1 | 2,2 |
| 379 | 0 | 1,2 | 1,2 | 1,2 |
| 380 | 0 | 1,2 | 1,2 | 1,2 |
| 381 | 0 | 1,2 | 1,2 | 1,1 |
| 382 | 0 | 1,2 | 1,2 | 1,2 |
| 383 | 0 | 1,2 | 1,1 | 2,2 |
| 384 | 0 | 1,2 | 1,2 | 1,1 |
| 385 | 0 | 1,2 | 1,2 | 1,2 |
| 386 | 0 | 1,1 | 2,2 | 1,1 |
| 387 | 0 | 1,1 | 2,2 | 1,1 |
| 388 | 0 | 2,2 | 1,1 | 1,2 |
| 389 | 0 | 1,1 | 2,2 | 1,1 |
| 390 | 0 | 1,2 | 1,2 | 1,2 |
| 391 | 0 | 2,2 | 1,1 | 1,2 |
| 392 | 0 | 1,2 | 1,2 | 1,2 |
| 393 | 0 | 1,2 | 1,2 | 1,1 |
| 394 | 0 | 1,2 | 1,2 | 1,2 |
| 395 | 0 | 1,1 | 2,2 | 1,1 |
| 396 | 0 | 1,2 | 1,2 | 1,2 |
| 397 | 0 | 1,2 | 2,2 | 1,2 |
| 398 | 0 | 1,2 | 1,2 | 1,1 |
| 399 | 0 | 2,2 | 1,1 | 2,2 |
| 400 | 0 | 1,1 | 2,2 | 1,1 |
| 401 | 0 | 1,2 | 1,2 | 1,2 |
| 402 | 0 | 2,2 | 1,1 | 2,2 |
| 403 | 0 | 1,1 | 2,2 | 1,1 |
| 404 | 0 | 1,2 | 1,2 | 1,2 |
| 405 | 0 | 2,2 | 1,1 | 2,2 |
| 406 | 0 | 1,2 | 1,2 | 1,2 |
| 407 | 0 | 2,2 | 1,1 | 1,2 |
| 408 | 0 | 1,2 | 1,2 | 1,2 |
| 409 | 0 | 2,2 | 1,1 | 2,2 |
| 410 | 0 | 1,2 | 1,2 | 1,2 |
| 411 | 0 | 1,2 | 1,2 | 1,1 |
| 412 | 0 | 2,2 | 1,1 | 1,2 |
| 413 | 0 | 2,2 | 1,1 | 1,1 |
| 414 | 0 | 1,2 | 1,2 | 1,2 |
| 415 | 0 | 2,2 | 1,1 | 2,2 |
| 416 | 0 | 1,2 | 1,1 | 1,1 |
| 417 | 0 | 2,2 | 1,1 | 1,2 |
| 418 | 0 | 2,2 | 1,1 | 2,2 |
| 419 | 0 | 1,2 | 1,2 | 1,2 |
| 420 | 0 | 2,2 | 1,1 | 1,2 |
| 421 | 0 | 2,2 | 1,1 | 2,2 |
| 422 | 0 | 2,2 | 1,1 | 1,1 |
| 423 | 0 | 2,2 | 1,1 | 2,2 |

|     |   |     |     |     |
|-----|---|-----|-----|-----|
| 424 | 0 | 2,2 | 1,1 | 2,2 |
| 425 | 0 | 1,1 | 2,2 | 1,1 |
| 426 | 0 | 1,2 | 1,2 | 1,2 |
| 427 | 0 | 2,2 | 1,1 | 2,2 |
| 428 | 0 | 1,2 | 1,2 | 1,2 |
| 429 | 0 | 1,1 | 2,2 | 1,1 |
| 430 | 0 | 1,2 | 1,2 | 1,2 |
| 431 | 0 | 2,2 | 1,1 | 1,2 |
| 432 | 0 | 1,1 | 2,2 | 1,1 |
| 433 | 0 | 2,2 | 1,1 | 2,2 |
| 434 | 0 | 2,2 | 1,1 | 1,2 |
| 435 | 0 | 1,1 | 1,2 | 1,1 |
| 436 | 0 | 1,1 | 2,2 | 1,1 |
| 437 | 0 | 1,2 | 1,2 | 1,1 |
| 438 | 0 | 1,2 | 1,2 | 1,2 |
| 439 | 0 | 1,2 | 1,2 | 1,2 |
| 440 | 0 | 1,2 | 1,2 | 1,2 |
| 441 | 0 | 2,2 | 1,1 | 2,2 |
| 442 | 0 | 1,2 | 1,2 | 1,2 |
| 443 | 0 | 1,2 | 1,1 | 1,1 |
| 444 | 0 | 1,2 | 1,2 | 1,2 |
| 445 | 0 | 1,2 | 1,2 | 1,2 |
| 446 | 0 | 2,2 | 1,1 | 1,1 |
| 447 | 0 | 2,2 | 1,1 | 1,2 |
| 448 | 0 | 1,2 | 1,2 | 1,2 |
| 449 | 0 | 1,2 | 1,2 | 1,2 |
| 450 | 0 | 2,2 | 1,1 | 2,2 |
| 451 | 0 | 1,1 | 2,2 | 1,1 |
| 452 | 0 | 1,2 | 1,2 | 1,2 |
| 453 | 0 | 1,2 | 1,2 | 1,2 |
| 454 | 0 | 2,2 | 1,1 | 1,2 |
| 455 | 0 | 1,2 | 1,2 | 1,1 |
| 456 | 0 | 2,2 | 1,1 | 1,2 |
| 457 | 0 | 1,2 | 1,2 | 1,2 |
| 458 | 0 | 1,1 | 2,2 | 1,1 |
| 459 | 0 | 1,2 | 1,2 | 1,2 |
| 460 | 0 | 1,2 | 1,2 | 1,1 |
| 461 | 0 | 1,2 | 1,2 | 1,1 |
| 462 | 0 | 1,2 | 1,2 | 1,2 |
| 463 | 0 | 1,2 | 1,2 | 1,1 |
| 464 | 0 | 1,2 | 1,2 | 1,2 |
| 465 | 0 | 1,2 | 1,2 | 1,2 |
| 466 | 0 | 1,1 | 2,2 | 1,1 |
| 467 | 0 | 1,2 | 1,2 | 1,2 |
| 468 | 0 | 1,1 | 2,2 | 1,1 |
| 469 | 0 | 1,2 | 1,2 | 1,1 |
| 470 | 0 | 2,2 | 1,1 | 2,2 |
| 471 | 0 | 1,2 | 1,2 | 1,1 |
| 472 | 0 | 1,2 | 1,2 | 1,1 |
| 473 | 0 | 2,2 | 1,1 | 2,2 |
| 474 | 0 | 1,2 | 1,1 | 1,2 |
| 475 | 0 | 2,2 | 1,1 | 1,1 |
| 476 | 0 | 1,1 | 1,2 | 1,1 |

|     |   |     |     |     |
|-----|---|-----|-----|-----|
| 477 | 0 | 1,2 | 1,1 | 1,2 |
| 478 | 0 | 2,2 | 1,1 | 1,2 |
| 479 | 0 | 1,2 | 1,2 | 1,2 |
| 480 | 0 | 1,1 | 1,2 | 1,1 |
| 481 | 0 | 2,2 | 1,1 | 1,2 |
| 482 | 0 | 1,2 | 1,2 | 1,1 |
| 483 | 0 | 1,2 | 1,2 | 1,2 |
| 484 | 0 | 1,2 | 1,2 | 1,2 |
| 485 | 0 | 1,1 | 1,2 | 1,1 |
| 486 | 0 | 1,2 | 1,2 | 1,2 |
| 487 | 0 | 1,1 | 2,2 | 1,1 |
| 488 | 0 | 1,2 | 1,2 | 1,2 |
| 489 | 0 | 2,2 | 1,1 | 2,2 |
| 490 | 0 | 2,2 | 1,1 | 2,2 |
| 491 | 0 | 2,2 | 1,1 | 2,2 |
| 492 | 0 | 1,2 | 1,1 | 1,2 |
| 493 | 0 | 2,2 | 1,1 | 2,2 |
| 494 | 0 | 1,1 | 1,2 | 1,1 |
| 495 | 0 | 2,2 | 1,1 | 2,2 |
| 496 | 0 | 2,2 | 1,1 | 2,2 |
| 497 | 0 | 1,2 | 1,2 | 1,2 |
| 498 | 0 | 1,2 | 1,2 | 1,2 |
| 499 | 0 | 1,2 | 1,2 | 1,2 |
| 500 | 0 | 2,2 | 1,1 | 2,2 |
| 501 | 0 | 1,2 | 1,2 | 1,2 |
| 502 | 0 | 1,2 | 1,2 | 1,2 |
| 503 | 0 | 1,2 | 1,2 | 1,2 |
| 504 | 0 | 1,2 | 1,2 | 1,2 |
| 505 | 0 | 2,2 | 1,1 | 1,2 |
| 506 | 0 | 1,2 | 1,2 | 1,2 |
| 507 | 0 | 1,1 | 2,2 | 1,1 |
| 508 | 0 | 2,2 | 1,1 | 2,2 |
| 509 | 0 | 2,2 | 1,1 | 2,2 |
| 510 | 0 | 1,2 | 1,1 | 1,2 |
| 511 | 0 | 2,2 | 1,1 | 2,2 |
| 512 | 0 | 1,2 | 1,2 | 1,2 |
| 513 | 0 | 1,2 | 1,2 | 1,2 |
| 514 | 0 | 1,1 | 2,2 | 1,1 |
| 515 | 0 | 1,1 | 1,2 | 1,1 |
| 516 | 0 | 2,2 | 1,1 | 2,2 |
| 517 | 0 | 2,2 | 1,1 | 2,2 |
| 518 | 0 | 1,2 | 1,1 | 1,2 |
